# Supplementary material for: Marburg Virus Persistence on Fruit as a Plausible Route of Bat to Primate Filovirus Transmission
Source: MDPI journal article supplement (doi:10.3390/v13122394), 2021-11-30
Supplement: s1 [file s1]

**Table S1.** Quantitative reverse transcriptase PCR primers and probes.

| Assay name                                                                                                                 | Oligo name     | Sequence, 5' to 3'                                                   |
|----------------------------------------------------------------------------------------------------------------------------|----------------|----------------------------------------------------------------------|
| Marburg virus viral protein 40 gene                                                                                        | Forward primer | GGA CCA CTG CTG GCC ATA TC                                           |
|                                                                                                                            | Reverse primer | GAG AAC ATI TCG GCA GGA AG                                           |
|                                                                                                                            | Probe 1        | <i>56-FAM-ATC CTA AAC-ZEN-AGG CTT GTC TTC TCT GGG ACT T-3/IABkFQ</i> |
|                                                                                                                            | Probe 2        | <i>56-FAM-ATC CTG AAT-ZEN-AAG CTC GTC TTC TCT GGG ACT T-3/IABkFQ</i> |
| Rift Valley Fever L segment                                                                                                | Forward primer | TGA AAA TTC CTG AGA CAC ATG G                                        |
|                                                                                                                            | Reverse primer | ACT TCC TTG CAT CAT CTG ATG                                          |
|                                                                                                                            | Probe          | <i>FAM-CAC AAG TCC ACA CAG GCC CCT TAC ATT G-BHQ1</i>                |
| Applied Biosystems Eukaryotic 18S rRNA Endogenous Control Kit (VIC®/TAMRA probe, primer limited), Thermo Fisher Scientific | Not available  | Not available                                                        |
